# Supplementary material for: Dissociation of lipotoxicity and glucotoxicity in a mouse model of obesity associated diabetes: role of forkhead box O1 (FOXO1) in glucose-induced beta cell failure
Source: PubMed Central journal article supplement — Diabetologia. 2010 Nov 24;54(3):605–16. doi: 10.1007/s00125-010-1973-8 (PMC3034032; doi:10.1007/s00125-010-1973-8), 2010-11-24
Supplement: 125_2010_1973_MOESM5_ESM.pdf [file 125_2010_1973_MOESM5_ESM.pdf]

## Electronic supplementary material

**ESM Table 2** Macronutrient content and energy density of the carbohydrate-containing (+CH) and carbohydrate-free (-CH) experimental diets given to 18-week-old NZO mice for 16 days

| <b>Macronutrient content</b>      | <b>-CH</b> | <b>+CH</b> |
|-----------------------------------|------------|------------|
| Total fat (% of total energy)     | 88.5       | 51.4       |
| Carbohydrates (% of total energy) | 0          | 32.4       |
| Protein (% of total energy)       | 11.5       | 16.2       |
| Energy density (kJ/g)             | 29.3       | 21.9       |
